# Supplementary material
Source: publisher figshare collection journal article supplement (https://acs.figshare.com/ndownloader/files/4310173)
Supplement: Supplementary file 1 [file 4310173]

*Supporting Information section for*

**Conformations of Antipyridines**

Michael Roumanos and Miklos Kertesz\*

*Department of Chemistry, Georgetown University, Washington, DC 20057-1227, USA*

---

Torsions were used to measure  $\alpha$  and  $\beta$  values because they are simple to calculate and are platform-versatile. Moreover, they were chosen since a torsion-defined  $\alpha/\beta$  angle closely describes the actual out-of-plane bending at each nitrogen, as seen in Fig. S1 and Fig. S2 below.

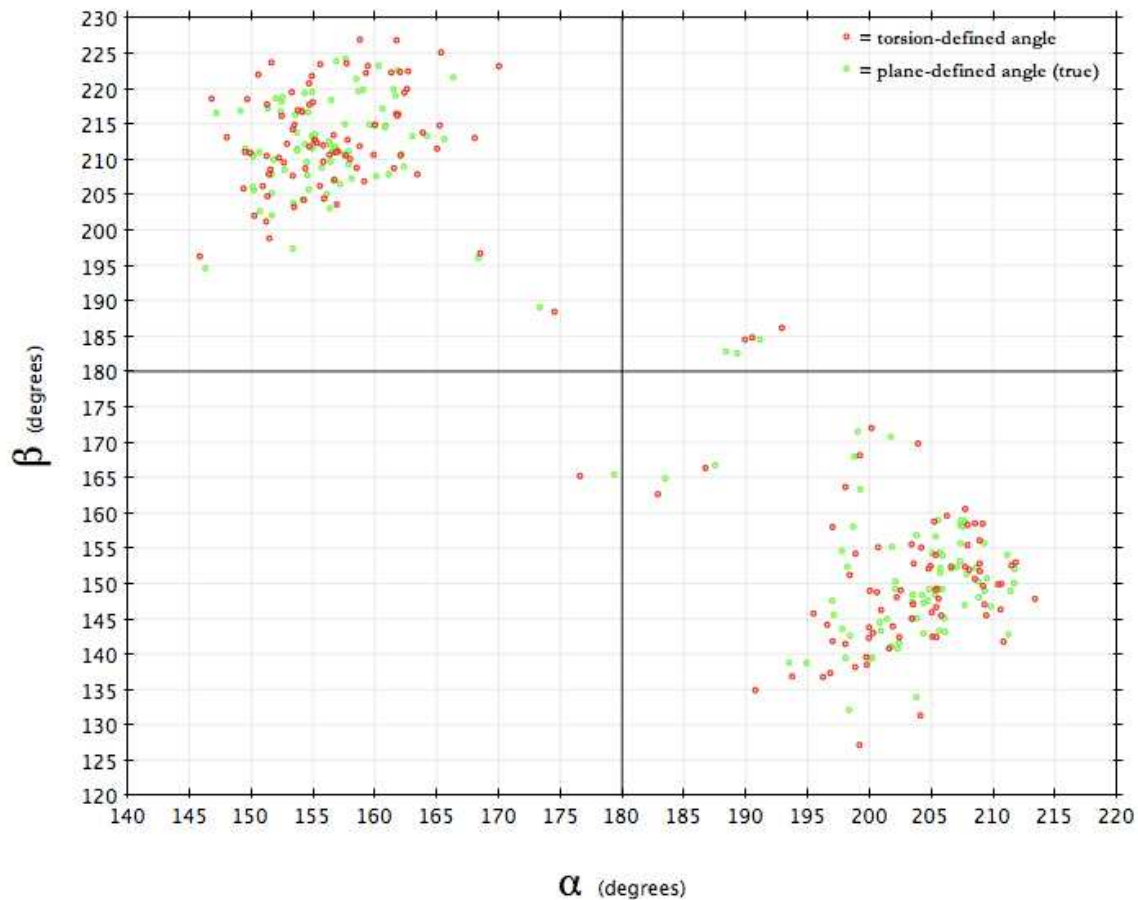

**Figure S1:** Torsion-defined angles are compared with true out-of-plane bending angles at the antipyrine substructure nitrogens. For graph clarity, calculated symmetry partners from space groups with an inversion center or glide plane were excluded.

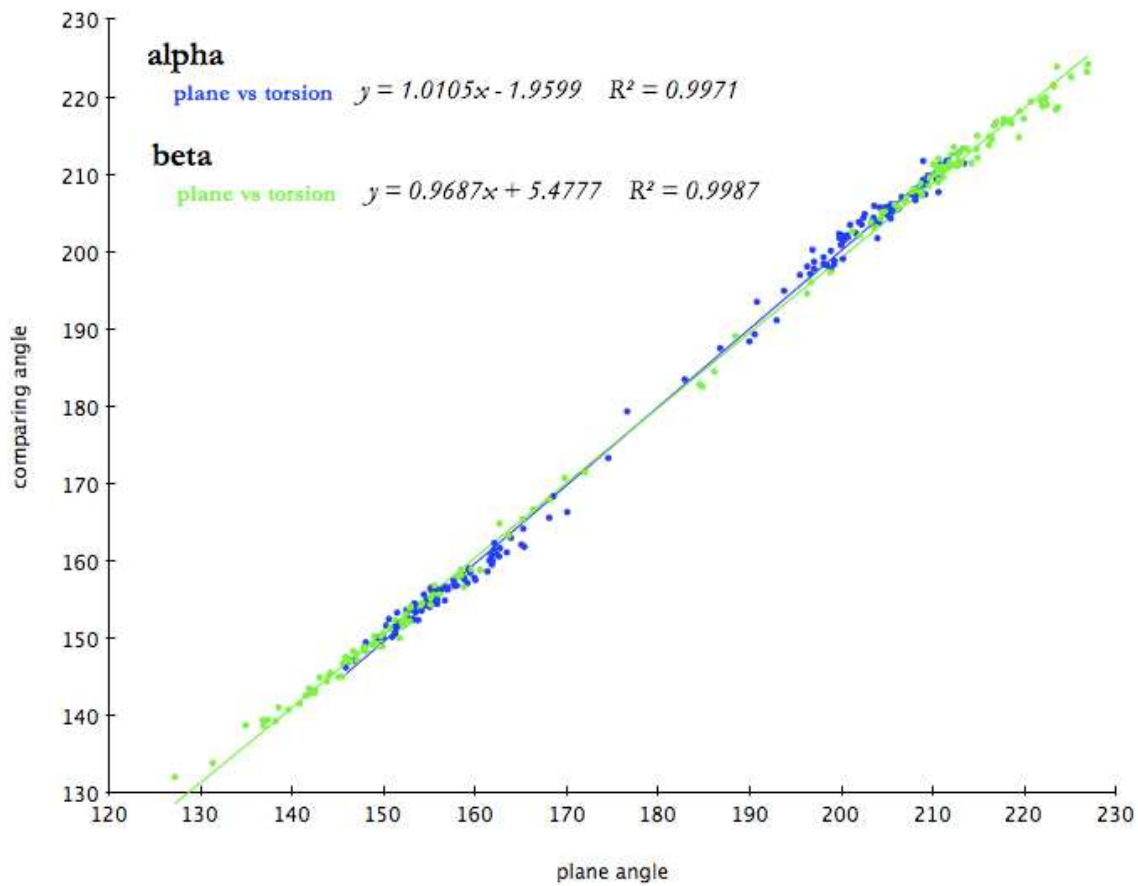

**Figure S2:** Torsion-defined  $\alpha$  and  $\beta$  angles are directly compared with true out-of-plane bending angles at the antipyrine substructure nitrogens.
